# Supplementary material for: Bis-ammonium immobilized polystyrenes with co-catalyzing functional end groups as efficient and reusable heterogeneous catalysts for synthesis of cyclic carbonate from CO2 and epoxides
Source: Royal Society of Chemistry journal article supplement (doi:10.1039/c5ra23808k), 2015-12-22
Supplement: c5ra23808k1.pdf [file c5ra23808k1.pdf]

## Supporting Information

### Bis-ammonium immobilized polystyrenes with co-catalyzing functional end groups as efficient and reusable heterogeneous catalysts for synthesis of cyclic carbonate from CO<sub>2</sub> and epoxides

Qingyuan Deng<sup>a</sup>, Gaohong He<sup>a,b</sup>, Yu Pan<sup>a</sup>, Xuehua Ruan<sup>a</sup>, Wenji Zheng<sup>a</sup>, Xiaoming Yan<sup>\*a</sup>

<sup>a</sup>State Key Laboratory of Fine Chemicals, School of Petroleum and Chemical Engineering, Dalian University of Technology, Panjin, LN 124221, China.

<sup>b</sup>Research and Development Center of Membrane Science and Technology, School of Chemical Engineering, Dalian University of Technology, Dalian, LN 116024, China.

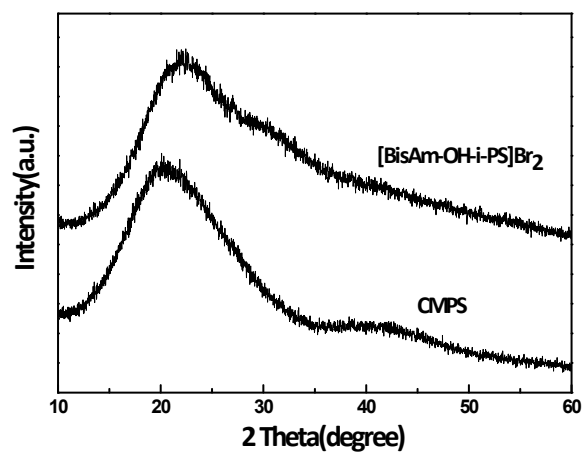

Fig. S1 XRD patterns of [BisAm-OH-i-PS]Br<sub>2</sub> and CMPS

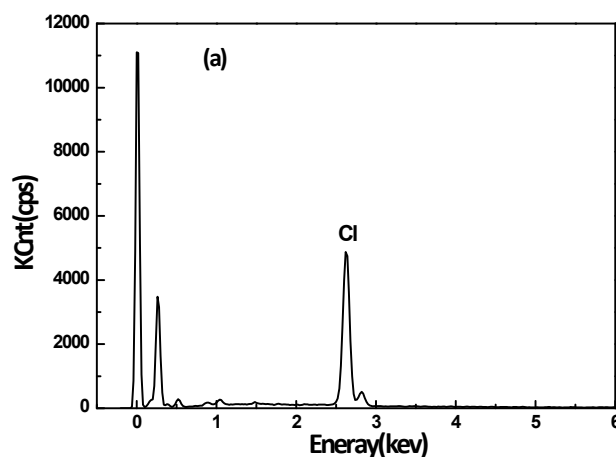

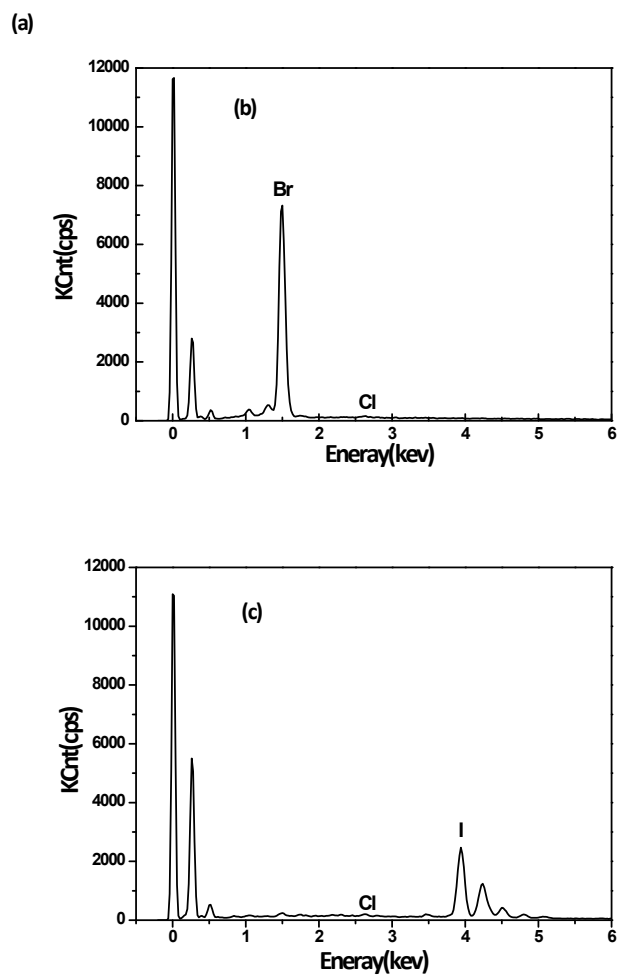

Fig. S2 EDS spectra of (a) [BisAm-OH-i-PS]Cl<sub>2</sub>, (b) [BisAm-OH-i-PS]Br<sub>2</sub> and (c) [BisAm-OH-i-PS]I<sub>2</sub>

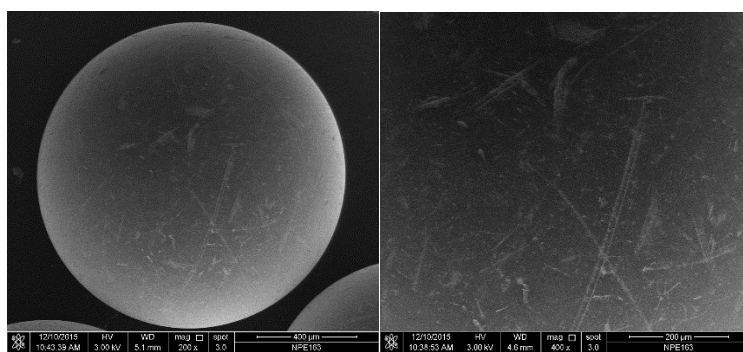

Fig. S3 SEM images of [BisAm-OH-i-PS]Br<sub>2</sub>.

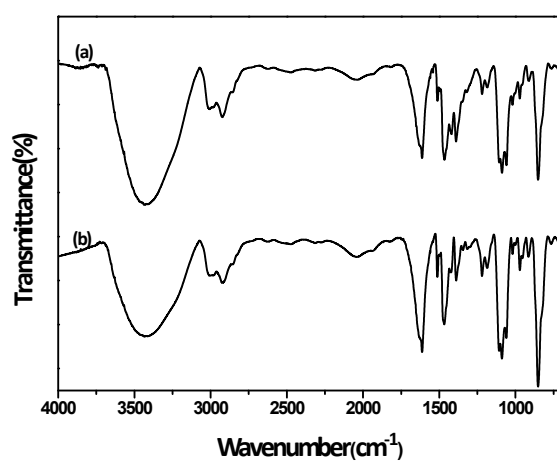

Fig. S4 FT-IR spectra of [BisAm-OH-i-PS]Br<sub>2</sub>: (a) fresh, (b) recovered.

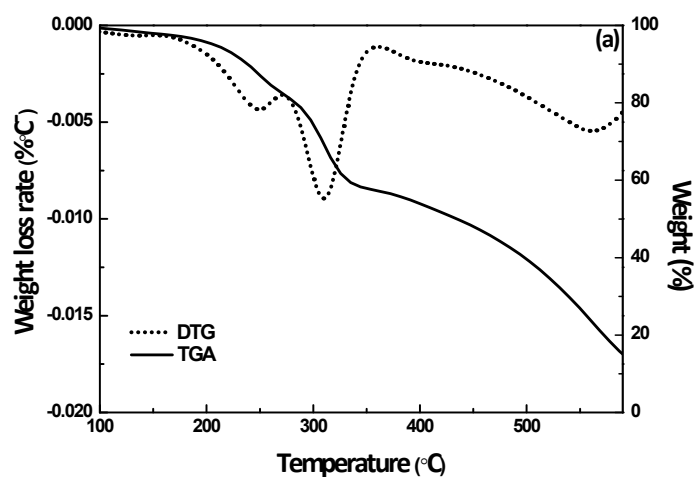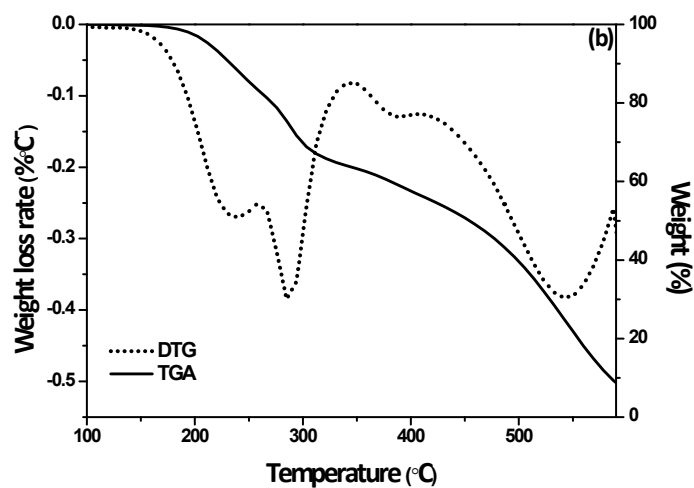

Fig. S5 TGA and DTG curves of [BisAm-OH-i-PS]Br<sub>2</sub>: (a) fresh, (b) recovered.
